# Supplementary material for: Specific roles for dendritic cell subsets during initiation and progression of psoriasis
Source: EMBO Mol Med. 2014 Sep 12;6(10):1312–27. doi: 10.15252/emmm.201404114 (PMC4287934; doi:10.15252/emmm.201404114)
Supplement: Supplementary file 1 [file emmm0006-1312-sd1.pdf]

## TABLE OF CONTENTS

### Supplementary information to

### Specific roles for dendritic cell subsets during initiation and progression of psoriasis

Elisabeth Glitznert<sup>1</sup>, Ana Korosec<sup>1</sup>, Patrick M. Brunner<sup>2</sup>, Barbara Drobits<sup>1</sup>, Nicole Amberg<sup>1</sup>, Helia B. Schonthaler<sup>3</sup>, Tamara Kopp<sup>2</sup>, Erwin F. Wagner<sup>3</sup>, Georg Stingl<sup>2</sup>, Martin Holcman<sup>1</sup>, and Maria Sibilial<sup>1\*</sup>

|                                   |        |
|-----------------------------------|--------|
| Supplementary Fig. 1-6.....       | p.1-6  |
| Supplementary Table 1.....        | p.7    |
| Supplementary Table 2.....        | p. 8   |
| Supplementary Figure legends..... | p.9-14 |

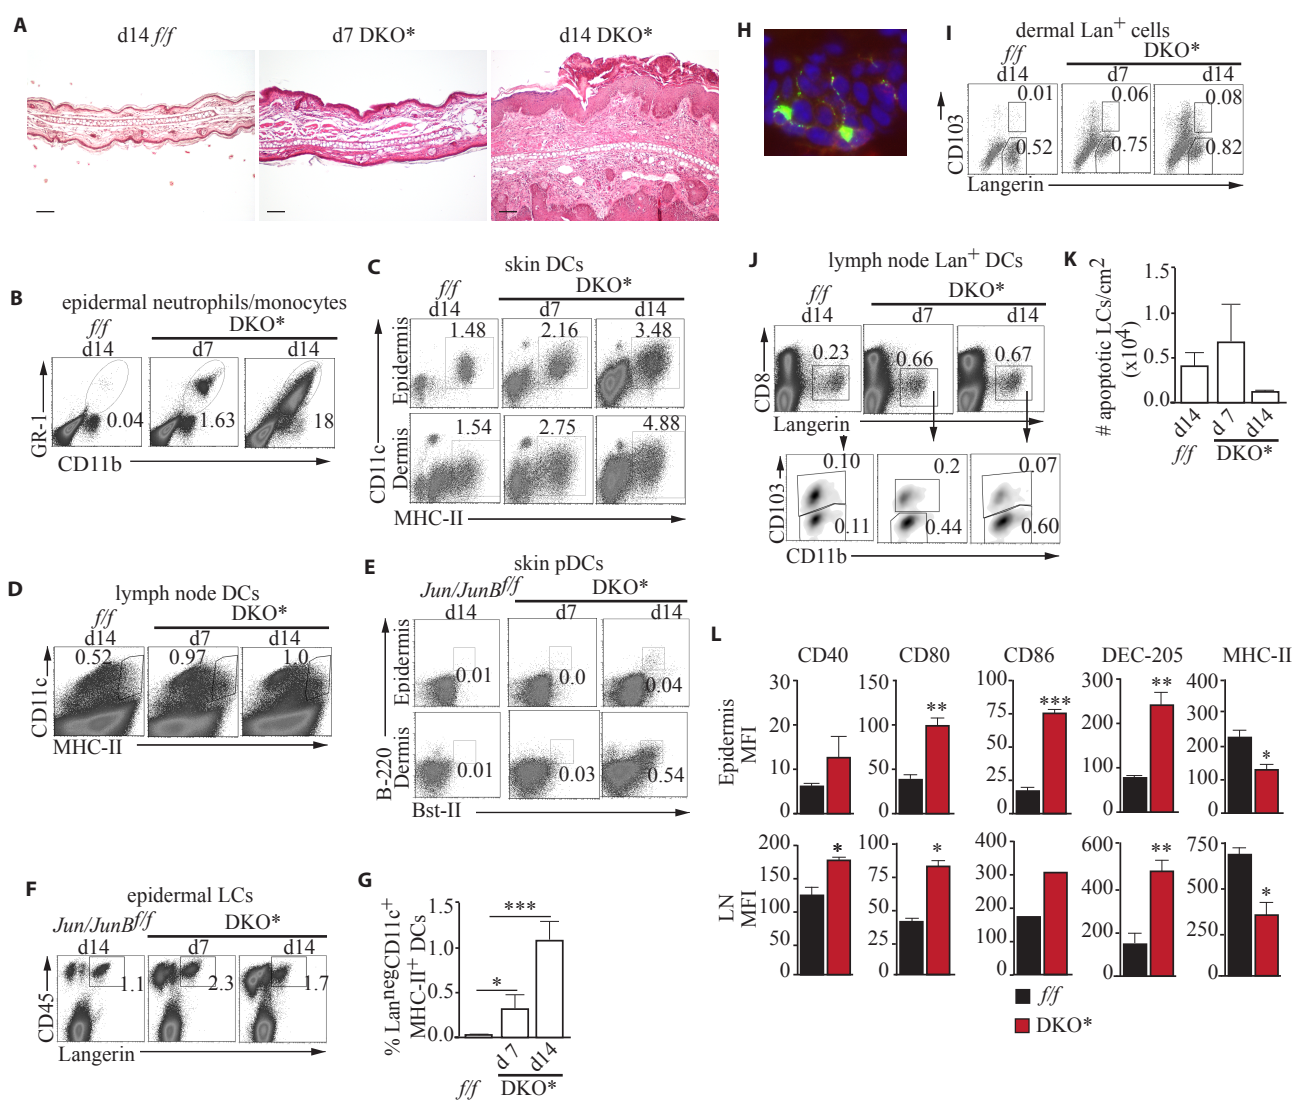

Supplementary Figure 1 Glitzner et al 2014

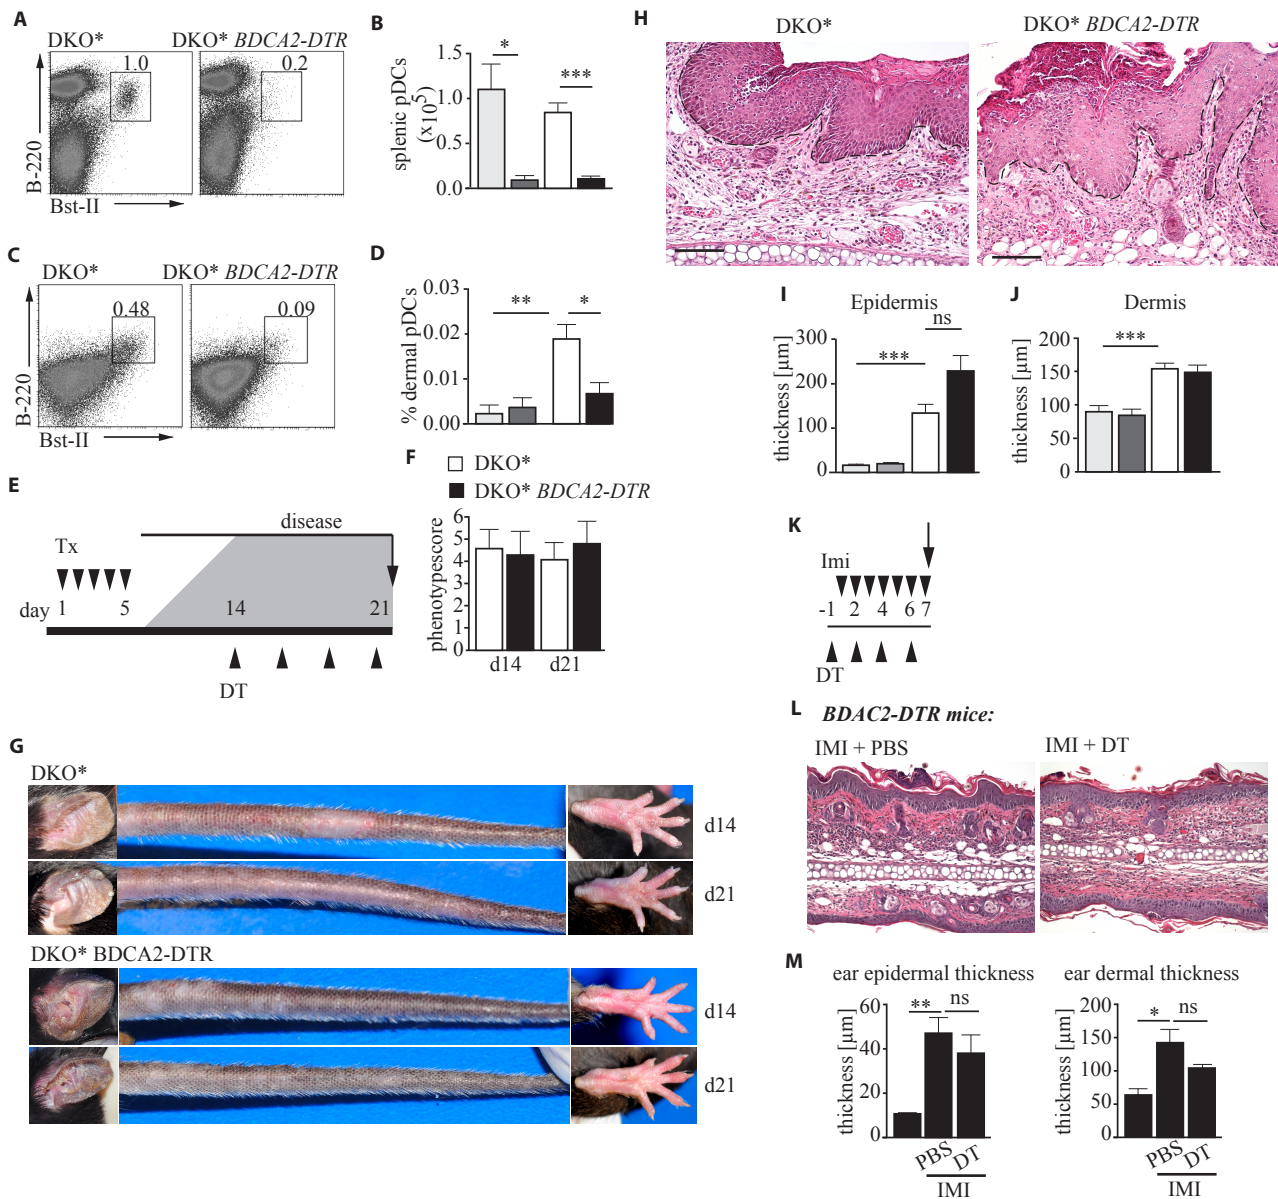

Supplementary Figure 2 Glitzner et al 2014

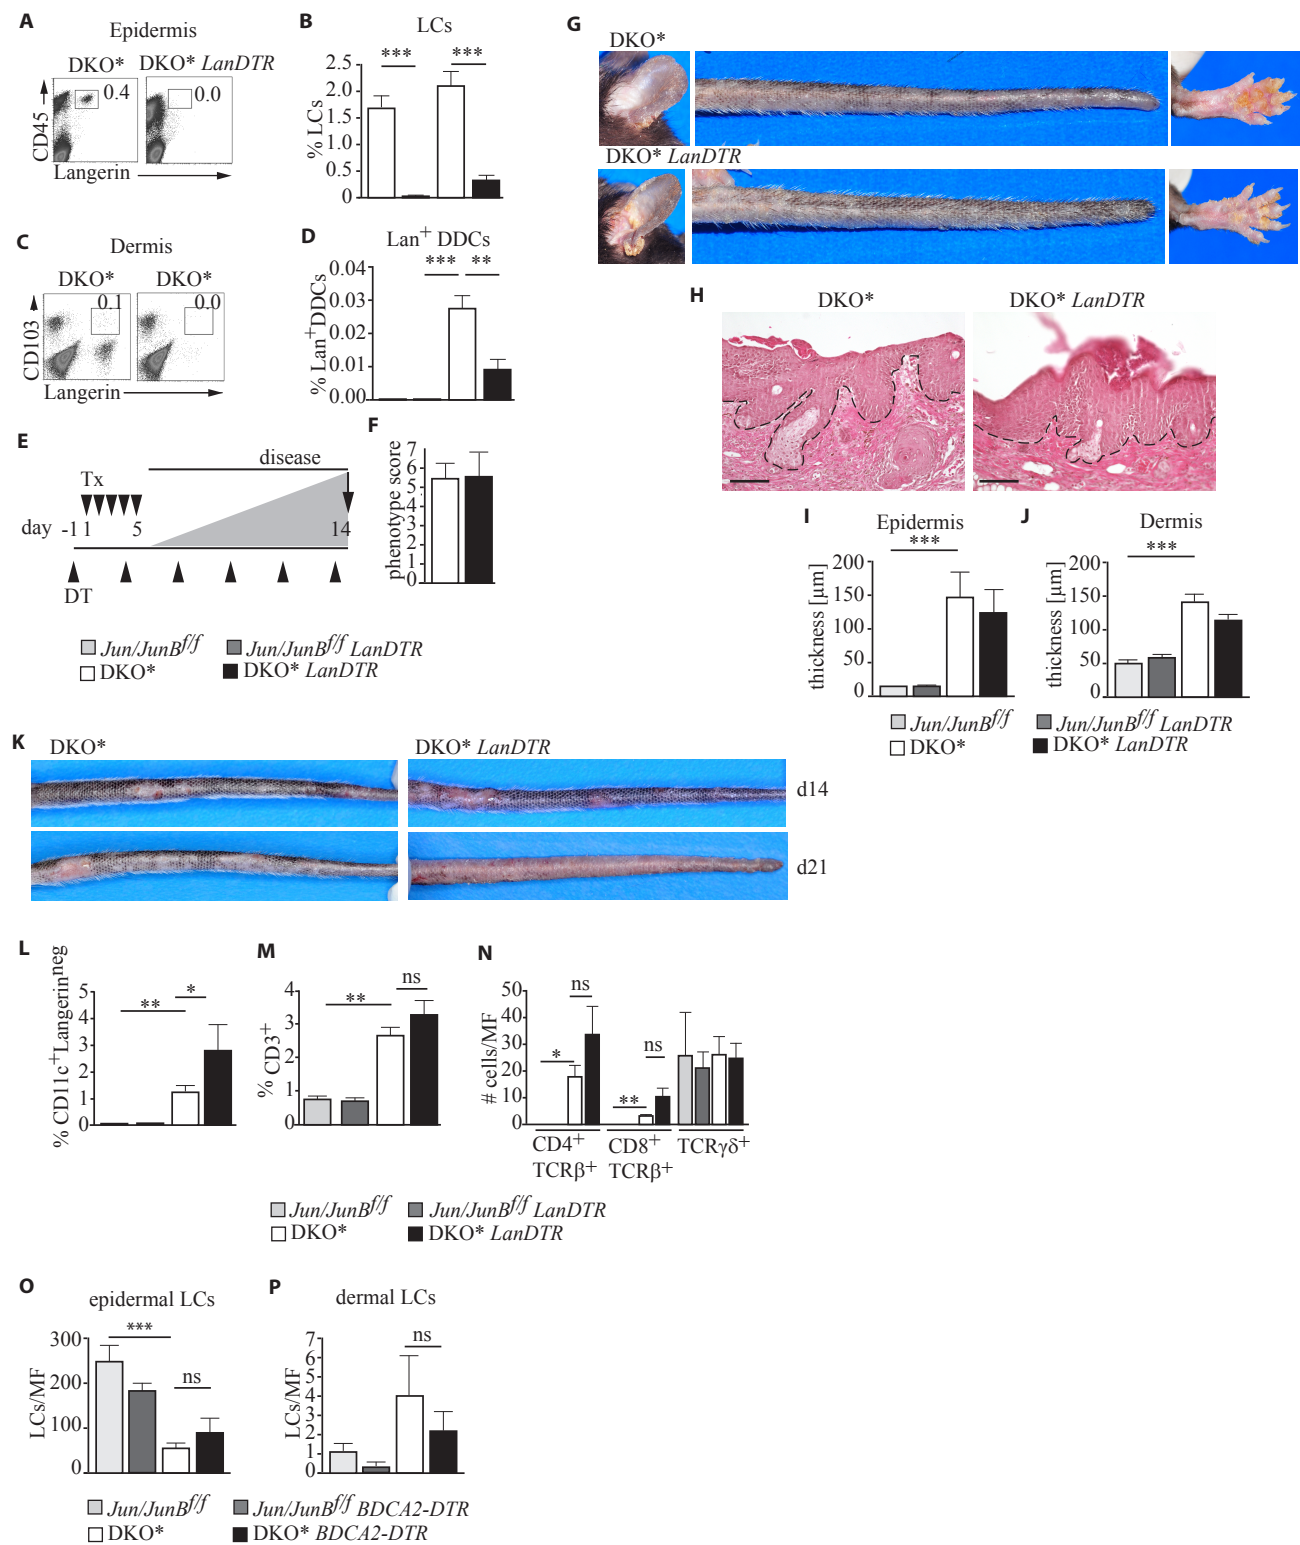

Supplementary Figure 3 Gritzner et al 2014

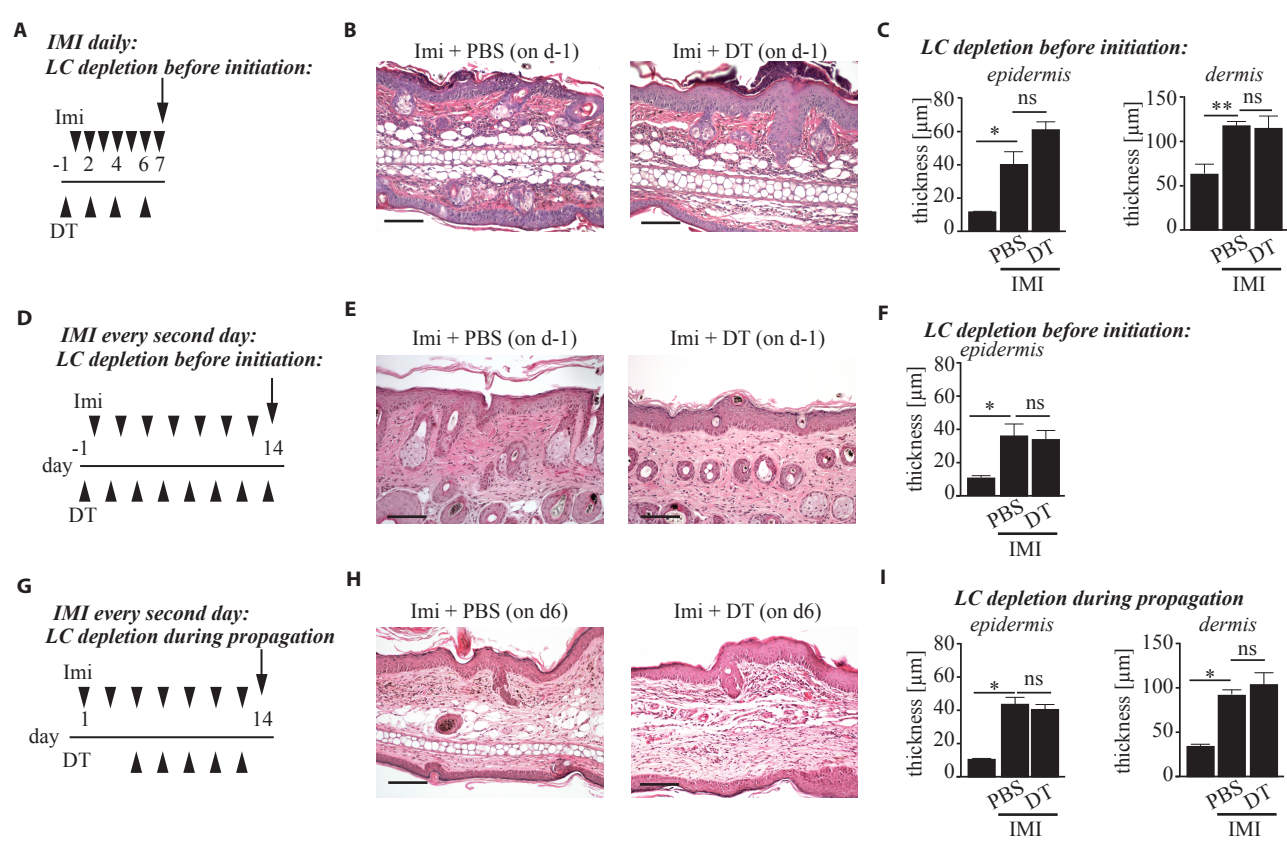

Supplementary Figure 4 Glitzner et al. 2014

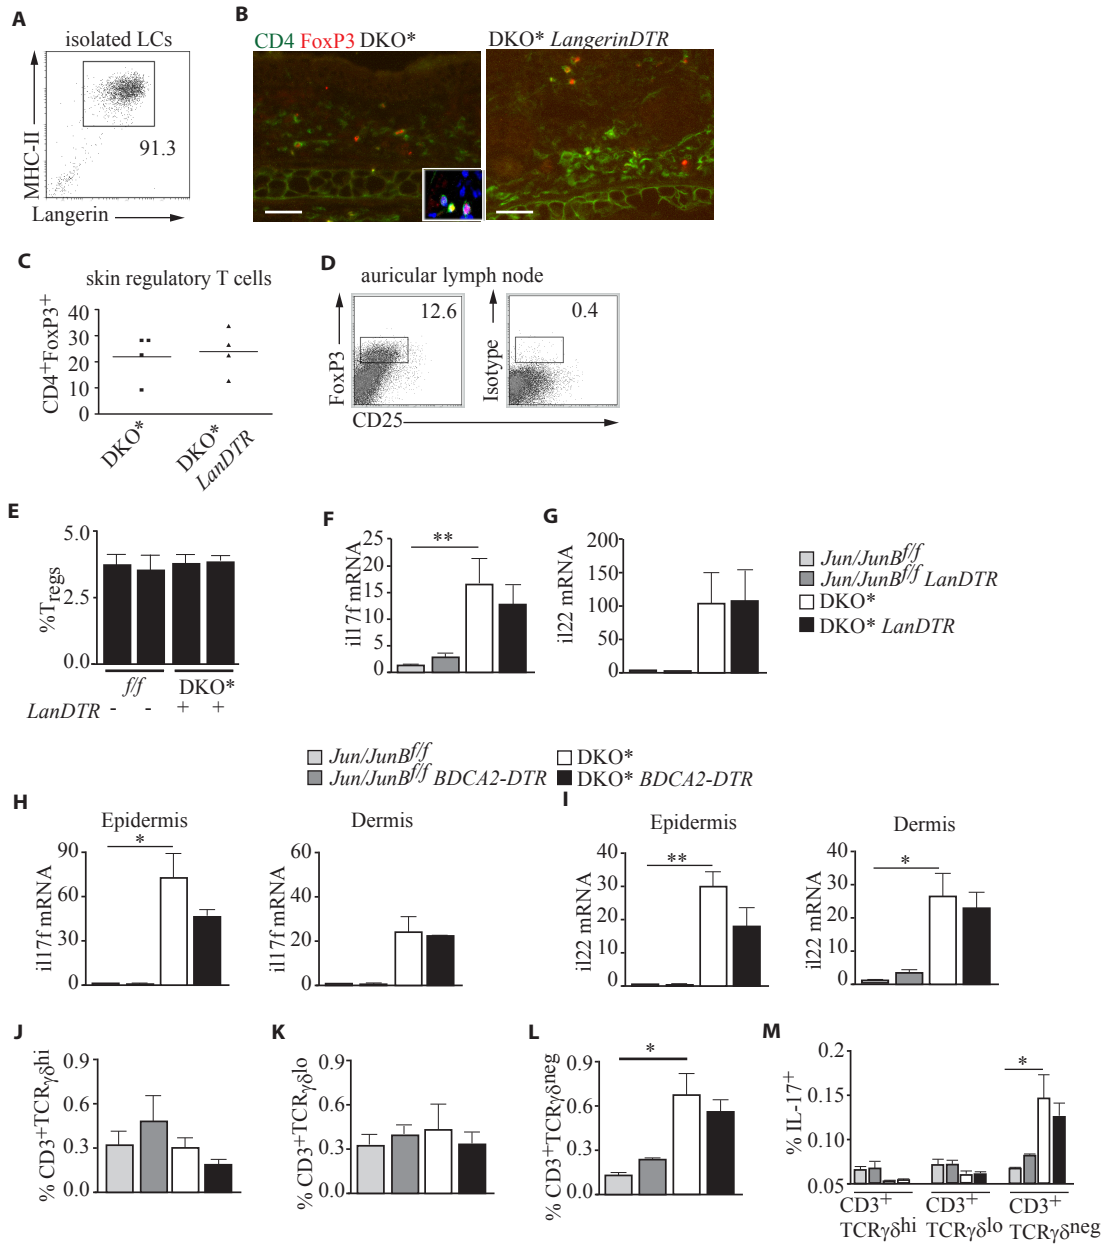

Supplementary Figure 5 Glitzner et al 2014

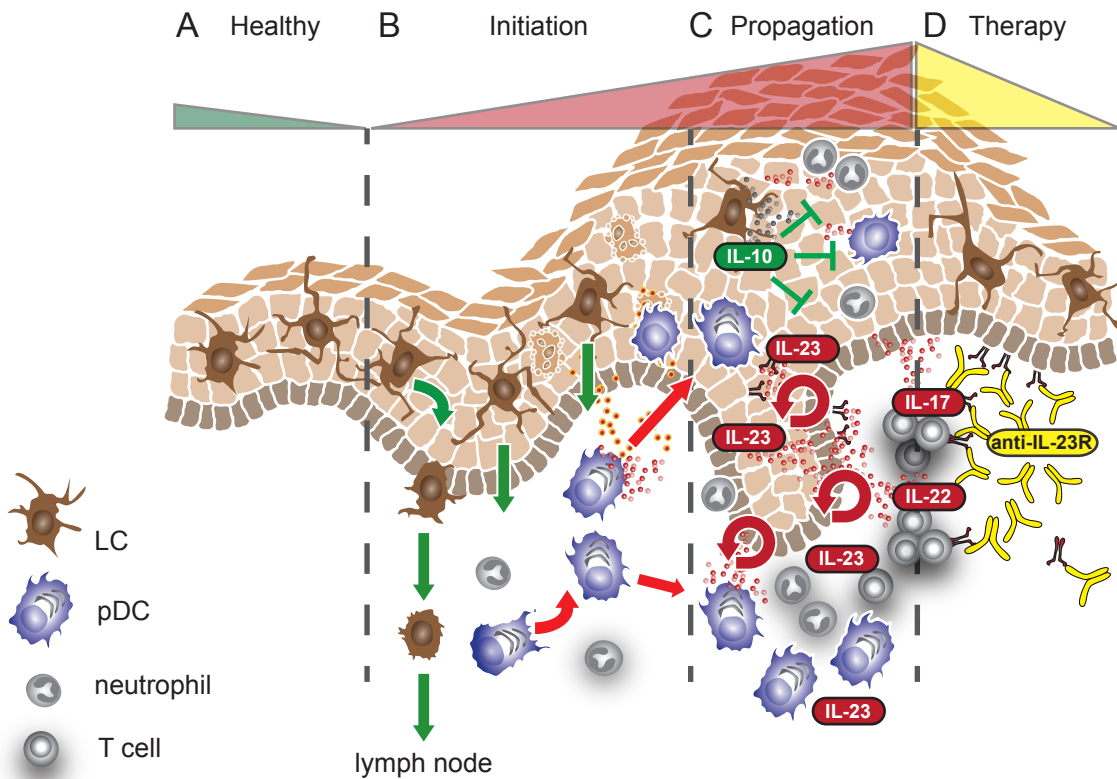

Supplementary Figure 6 Glitzner et al 2014

| Antigen                       | Clone                    | Company               |
|-------------------------------|--------------------------|-----------------------|
| <b>Anti-mouse antibodies:</b> |                          |                       |
| Bst-II                        | 927                      | Biolegend             |
| B-220                         | RA3-6B2                  | Biolegend             |
| CCR2                          | 475301                   | Millipore             |
| CD3 $\epsilon$                | 145-2C11                 | Biolegend             |
| CD4                           | GK1.5                    | Biolegend             |
| CD8 $\alpha$                  | 53-6.7                   | Biolegend             |
| CD11b                         | M1/70                    | Biolegend             |
| CD11c                         | N418                     | Biolegend             |
| CD16/CD32                     | 93                       | Biolegend             |
| CD24                          | M1/69                    | Biolegend             |
| CD40                          | 3/23                     | Biolegend             |
| CD45                          | 30F11                    | Biolegend             |
| CD45.1                        | A20                      | Biolegend/ebioscience |
| CD45.2                        | 104                      | Biolegend             |
| CD64                          | X54-5/7.1                | Biolegend             |
| CD80                          | 16-10A1                  | Biolegend             |
| CD86                          | GL-1                     | Biolegend             |
| CD103                         | 2E7                      | Biolegend             |
| CD205                         | NLDC-145                 | Biolegend             |
| GR-1                          | RB6-8C5                  | ebioscience           |
| I-A/I-E                       | M5/114.15.2              | Biolegend             |
| IL-17a                        | TC11-18H10.1             | Biolegend             |
| Langerin                      | 929F3.01                 | Dendritics            |
| Ly-6C                         | HK1.4                    | Biolegend             |
| Ki-67                         | B56                      | BD Bioscience         |
| PD-L1                         | 10F.9G2                  | Biolegend             |
| TCR $\beta$                   | H57-597                  | Biolegend             |
| TCR $\gamma\delta$            | UC7-13D5                 | Biolegend             |
| mouse IgG1K                   | MOPC-21                  | BD Biosciences        |
| rat IgG2bK                    | eB149/10H5               | ebioscience           |
| rat IgG2aK                    | eBR2a                    | ebioscience           |
| Cleaved caspase-3             | Accession No.<br>#P42574 | R&D Systems           |
| <b>Anti-human antibodies:</b> |                          |                       |
| BDCA-2                        | 104C12.08                | Dendritics            |
| Langerin                      | DCGM4                    | Beckman Coulter       |

*Supplementary Table 1: Antibodies used for flow cytometric stainings, immunofluorescence and immunohistochemistry*

| <b>Transcript</b>          | <b>Forward primer</b>          | <b>Reverse primer</b>           |
|----------------------------|--------------------------------|---------------------------------|
| TATA-binding protein (TBP) | 5'-GGGGAGCTGTGATGTGAAGT-3'     | 5'-CCAGGAAATAAT TCTGGCTCAT-3'   |
| $\beta$ -Actin             | 5'-CGGTTCCGATGCCCTGAGGCTCTT-3' | 5'- CGTCACACTTCATGATGGAATTGA-3' |
| IL-10                      | 5'-CAGAGCCACATGCTCCTAGA-3'     | 5'-GTCCAGCTGGTCCTTTGTTT-3'      |
| IL-17f                     | 5'-TGCTACTGTTGATGTTGGGAC-3'    | 5'-AATGCCCTGGTTTTGGTTGAA-3'     |
| IL-22                      | 5'-AGCAGGTGCTCAACTTCACC-3'     | 5'-TGGATGTTCTGGTCGTCACC-3'      |
| IL-23 p19                  | 5'-CAGCTCTCTCGGAATCTCTGC-3'    | 5'-TGGCTGTTGTCCTTGAGTCC-3'      |
| Mx1                        | 5'-GAGCAAGTCTTCTTCAAGGATCA-3'  | 5'-GGGAGGTGAGCTCCTCAGT-3'       |

*Supplementary Table 2: Primer sequences used for quantification of mRNA transcripts via quantitative real-time PCR.*

**Supplementary Fig. 1 - The dendritic cell network in DKO\* mice.** (A) Representative H&E staining of ear sections of indicated mice. Scale bars indicate 100  $\mu$ m. Flow cytometric analysis showing (B) epidermal neutrophils/monocytes ( $CD11b^+GR-1^{lo-hi}$  cells), (C) dermal and epidermal DCs (plots are gated on  $CD45^+$  cells), (D) migratory DCs ( $CD11c^+MHC-II^{hi}$ ) in the auricular lymph node, (E) dermal and epidermal pDCs ( $CD45^+CD11c^{lo}B-220^+Bst-II^+CD11b^+$  cells) (plots gated on  $CD45^+$  cells) and (F) epidermal LCs ( $CD45^+Lan^+$ ) of indicated mice. (G) Quantification of epidermal  $Lan^{neg}$  APCs ( $CD11c^+MHC-II^+Lan^{neg}$ ) in auricular lymph nodes measured by flow cytometry (n=7-16). (H) Representative ear section of a day 14 DKO\* mouse stained with Lan (green) and CD11c (red). Nuclear staining with HOECHST (blue). Flow cytometric analysis showing (I) dermal LCs and  $Lan^+$  DDCs (gated on  $CD45^+CD11c^+$  cells) and (J) LCs ( $CD8^{neg}Lan^+CD11b^+CD103^{neg}$  cells) in auricular lymph nodes of indicated mice. Lower plots are gated on  $Lan^+CD8^-$  cells. (K) Numbers of apoptotic LCs counted on at least 5 randomly chosen fields of images of ear sheets, (n=5-6). Magnification 10x. (L) Expression levels of activation markers on LCs isolated from epidermis (upper panel) or auricular LN (lower panel) (n=1-3). Numbers in flow cytometric plots indicate percentage of live single cells. Data represent mean  $\pm$  SEM. Data were analyzed using unpaired Student's t-test. (\* $p < 0.05$ , \*\* $p < 0.01$ , \*\*\* $p < 0.001$ ). P values for this figure are available in Supplementary Table 3. Statistical source data for this figure can be found in the Source data section.

**Supplementary Fig. 2 - pDCs are dispensable during the progression phase of psoriatic disease.** (A-D) Efficiency of pDC depletion in DKO\* mice treated according to the regimen depicted in Fig. 3A. (A) Flow cytometric analysis showing splenic pDCs ( $CD45^+CD11c^+B-220^+Bst-II^+CD11b^{neg}$  cells) and (B) quantification of splenic pDCs in indicated mice (n=5-8). (C) Flow cytometric analysis showing dermal pDCs ( $CD45^+CD11c^+B-220^+Bst-$

$\text{II}^+\text{CD11b}^{\text{neg}}$  cells) (plots gated on  $\text{CD45}^+$  cells) and (D) dermal pDC quantification in indicated mice (n=3-7). (E) Psoriatic disease was induced by five daily consecutive injections of Tx ( $\blacktriangledown$ ), and on day 14, when psoriatic disease had developed, pDCs were depleted by injection of DT ( $\blacktriangle$ ) (applied every other day). Mice were analyzed on day 21. (F) Mean psoriatic phenotype score of the indicated mice was determined on day 14 and day 21 after disease induction (n=9-13). (G) Representative images of affected body parts of indicated mice on day 14 and day 21. (H) Representative H&E staining of ear sections of indicated mice on day 21. Scale bars indicate 100  $\mu\text{m}$ . Dashed line indicates epidermal-dermal junction. (I) Histogram showing epidermal and (J) dermal thickness of skins of the indicated genotypes. 10 randomly chosen fields of 3-4 independent images per mouse were analyzed (n=4-8). Magnification 4x. (K-M) *BDCA2-DTR* mice were injected either with PBS or DT ( $\blacktriangle$ ) starting on d -1 every other day, and treated daily for 6 days with Imi ( $\blacktriangledown$ ) on ears. Experiment was terminated on d 7 (K). (L) Representative H&E stained ear skin sections of indicated mice are shown. (M) Histogram showing epidermal and dermal thickness of ears of mice of the indicated genotype. (n=3). Data represent mean  $\pm$  SEM. 10 randomly chosen fields of 3-4 independent images per mouse were analyzed, magnification=4x. Data were analyzed using unpaired Student's t-test (\* $p < 0.05$ , \*\* $p < 0.01$ , \*\*\* $p < 0.001$ ). Flow cytometric quantifications are depicted as percentage of live cells. *Jun/JunB<sup>ff</sup>* (light grey), *Jun/JunB<sup>ff</sup> BDCA2-DTR* (dark grey), DKO\* (white) and *DKO\*BDCA2-DTR* (black). Data represent mean  $\pm$  SEM. Data for B and D were analyzed using unpaired Student's T-test, and for I and J using Mann-Whitney U Test (F, I, J) (\* $p < 0.05$ , \*\* $p < 0.01$ , \*\*\* $p < 0.001$ ). P values for this figure are available in Supplementary Table 3. Statistical source data for this figure can be found in the Source data section.

**Supplementary Fig. 3 - Lan<sup>+</sup> APCs are dispensable for initiation of psoriatic disease, but counteract chronic psoriatic inflammation.** (A-D) Efficiency of Lan<sup>+</sup> APC depletion in DKO\* mice treated according to Fig. 4A. Mice were treated 14 days after psoriatic disease induction for 1 week with DT. Flow cytometric analysis (A) and (B) quantification of epidermal LCs (Lan<sup>+</sup>CD45<sup>+</sup> cells) (n=9-12). (C) Flow cytometric analysis and (D) quantification of dermal Lan<sup>+</sup> DDCs (CD45<sup>+</sup>CD103<sup>+</sup>Lan<sup>+</sup> cells, plots gated on CD45<sup>+</sup> cells) (n=4-8). (E-P) Role of Lan<sup>+</sup> APCs during disease initiation. (E) Mice were injected with DT (▲) every third day starting 1 day prior to Tx (▼) and euthanized on day 14 after disease induction. (F) Mean psoriatic phenotype score of the indicated mice was determined on day 14 after disease induction (n=12-16). (G) Representative images of affected body parts of indicated mice. (H) H&E stained ear sections of indicted mice. Scale bars indicate 100 μm. Dashed line indicates epidermal-dermal junction. (I) Histograms showing epidermal and (J) dermal thickness of skins of the indicated genotype. 10 randomly chosen fields of 3-4 independent images per mouse were analyzed (n=8-14). Magnification 4x. (K-N) Experiments were performed as indicated in Fig. 4A. (K) Representative images of affected body parts of DKO\* and DKO\* *LanDTR* mice one week after the first DT injection. (L) Flow cytometric analysis showing epidermal Lan<sup>neg</sup> CD11c<sup>+</sup> APCs (CD45<sup>+</sup>CD11c<sup>+</sup>Lan<sup>neg</sup> cells) (n=11-18) and (M) T cells (CD45<sup>+</sup>CD3<sup>+</sup>) (n=8-12). (N) CD4<sup>+</sup> T cells (TCRβ<sup>+</sup>CD4<sup>+</sup>), CD8<sup>+</sup> T cells (TCRβ<sup>+</sup>CD8<sup>+</sup>) and γδ T cells (TCRγδ<sup>+</sup>) counted on at least 5 randomly chosen fields of ear sections of indicated mice (n=3-9). *Jun/JunB<sup>ff</sup>* (light grey), *Jun/JunB<sup>ff</sup> LanDTR* (dark grey), DKO\* (white) and DKO\* *LanDTR* (black) mice. (O,P) Experiments were performed as indicated in Fig. 3A. (O) epidermal and (P) dermal LCs (Langerin<sup>+</sup>CD103<sup>neg</sup> cells) were counted on at least 5 randomly chosen fields of ear sections of indicated mice (n=4-6). *Jun/JunB<sup>ff</sup>* (light grey), *Jun/JunB<sup>ff</sup> BDCA2-DTR* (dark grey), DKO\* (white) and DKO\* *BDCA2-DTR* (black) mice. Flow cytometric quantifications are depicted as percentage of live

cells. Data represent mean  $\pm$  SEM. Data for B, D, N, O and P were analyzed using unpaired Student's t-test, for F, L and M using Wilcoxon signed-rank test and for I and J using Mann-Whitney U test (\* $p < 0.05$ , \*\* $p < 0.01$ , \*\*\* $p < 0.001$ ). P values for this figure are available in Supplementary Table 3. Statistical source data for this figure can be found in the Source data section.

**Supplementary Fig. 4 - LC or pDC depletion before or during Imiquimod (Imi) treatment does not influence skin inflammation.** (A) *LanDTR* mice were injected either with PBS or DT ( $\blacktriangle$ ) starting on d -1 every other day, and treated daily for 6 days with Imi ( $\blacktriangledown$ ) on ears. Experiment was terminated on d 7. (B) Representative picture of H&E stained ear skin sections of indicated mice are shown. (C) Histogram showing epidermal and dermal thickness of mice of the indicated genotype ( $n=3$ ). (D) *LanDTR* mice were injected either with PBS or DT ( $\blacktriangle$ ) starting on d -1 twice weekly and treated every other day for 14 days with Imi ( $\blacktriangledown$ ) on the back skin. (E) H&E stained back skin sections are shown. (F) Histogram showing epidermal thickness of mice of the indicated genotype ( $n=4-5$ ) (G) *LanDTR* mice were treated every other day for 14 d with Imi on ears. On d5, when inflammation was evident, DT or PBS was injected every third day. (H) H&E stained ear sections of indicated mice are shown. (I) Histograms showing epidermal and dermal thickness of mice of the indicated genotype ( $n=3-5$ ) Data represent mean  $\pm$  SEM. 10 randomly chosen fields of 3-4 independent images per mouse were analyzed magnification=4x. Data were analyzed using unpaired Student's t-test (\* $p < 0.05$ , \*\* $p < 0.01$ , \*\*\* $p < 0.001$ ). P values for this figure are available in Supplementary Table 3. Statistical source data for this figure can be found in the Source data section.

**Supplementary Fig. 5 - LC or pDC depletion impact on immunological skin and lymph**

**node priming.** (A) Flow cytometric analysis showing LCs isolated from epidermal ear sheets of DKO\* mice on day 8 after disease induction. (B) Representative pictures of ear sections of indicated mice stained with CD4 (green) and FoxP3 (red) (Inlay: additional staining with HOECHST). (C) CD4<sup>+</sup>FoxP3<sup>+</sup> cells counted on at least 8 randomly chosen fields of ear sections (n=4). Magnification 10x. (D) Flow cytometric analysis showing auricular lymph node Tregs. Gated on CD3<sup>+</sup>CD4<sup>+</sup> cells. (E) Number of Tregs (CD3<sup>+</sup>CD4<sup>+</sup>CD25<sup>+</sup>FoxP3<sup>+</sup> cells) determined via flow cytometry in auricular lymph nodes of indicated mice (n=3-7). (F) Relative *IL17f* (n=7-8) and (G) *IL-22* mRNA (n=6-8) expression in epidermal cells of the indicated mice treated as depicted in Fig. 4A. (H) Relative epidermal (n=3-4) and dermal (n=3-7) *IL17f* and (I) epidermal (n=1-3) and dermal (n=3-7) *IL-22* mRNA expression in epidermal and dermal cells of the indicated mice treated as depicted in Fig. 3A. (J) Quantification of flow cytometric analysis showing CD45<sup>+</sup>CD3<sup>+</sup>TCR $\gamma\delta$ <sup>neg</sup>, (K) CD45<sup>+</sup>CD3<sup>+</sup>TCR $\gamma\delta$ <sup>neg</sup>, CD45<sup>+</sup>CD3<sup>+</sup>TCR $\gamma\delta$ <sup>hi</sup> (L) CD45<sup>+</sup>CD3<sup>+</sup>TCR $\gamma\delta$ <sup>lo</sup> cells and (M) IL-17 production by these subsets in the skin of *Jun/JunB<sup>ff</sup>*, *Jun/JunB<sup>ff</sup>BDCA2-DTR*, DKO\* and DKO\* *BDCA2-DTR* mice (n=6-7). Data were analyzed using unpaired Student's t-test. (\*p<0.05, \*\*\*p<0.001). Flow cytometric quantifications are depicted as percentage of live cells. Scale bars indicate 100  $\mu$ m. Data represent mean +/- SEM. P values for this figure are available in Supplementary Table 3. Statistical source data for this figure can be found in the Source data section.

**Supplementary Fig. 6 - Role of pDCs and LCs in psoriasis initiation and progression.** (A)

In healthy skin, LCs populate the epidermis in high numbers, whereas pDCs are absent. (B) During the initiation phase of psoriasis, LCs start to emigrate from the epidermis to the local draining lymph nodes, whereas pDCs infiltrate the dermis and epidermis. pDCs support the

initiation of the inflammatory cascade, leading to enhanced production of IL-23 and subsequent development of all psoriatic hallmarks. (C) In the propagation phase, LC numbers decrease in the epidermis, while remaining LCs dampen inflammation by local production of IL-10, thereby suppressing IL-23 production. (D) Therapeutic inhibition of IL-23 signaling (anti-IL-23R) blocks the inflammatory cascade leading to regression of psoriatic lesions. Bone marrow-derived LCs repopulate the epidermis, ultimately resulting in complete reestablishment of skin homeostasis.

**Supplementary Table 1** – Antibodies used for immunofluorescence / immunohistochemistry  
/ flow cytometry

**Supplementary Table 2** – Primer sequences employed for quantitative real-time RT PCRs
